# Supplementary material for: Cost-effort analysis of Baited Remote Underwater Video (BRUV) and environmental DNA (eDNA) in monitoring marine ecological communities
Source: PeerJ journal article supplement (doi:10.7717/peerj.17091), 2024-04-30

**mod**

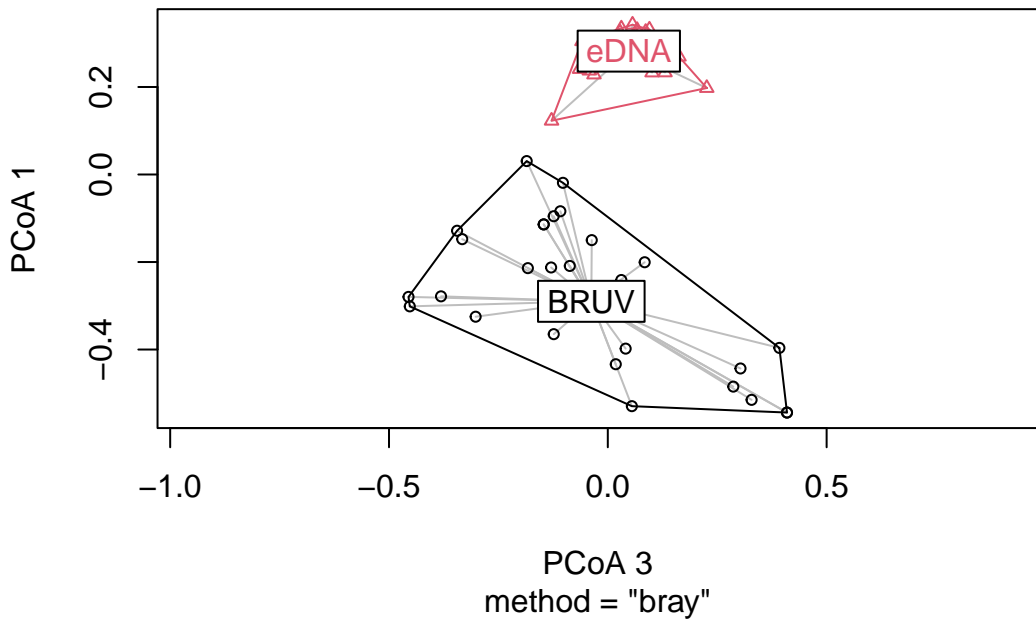

Supplement: APPENDIX_Figure_4.pdf [file APPENDIX_Figure_4.pdf]
